# Supplementary material
Source: publisher figshare collection journal article supplement (https://acs.figshare.com/ndownloader/files/4944280)
Supplement: Supplementary file 1 [file 4944280]

## **Supporting Information**

### **Nature of WO<sub>x</sub> Sites on SiO<sub>2</sub> and their Molecular Structure-Reactivity/Selectivity**

### **Relationships for Propylene Metathesis**

Soe Lwin<sup>a</sup>, Yuanyuan Li<sup>b</sup>, Anatoly I. Frenkel<sup>b</sup>, Israel E. Wachs<sup>a\*</sup>

<sup>a</sup> *Operando* Molecular Spectroscopy and Catalysis Laboratory, Department of Chemical Engineering, Lehigh University, Bethlehem, PA 18015, USA

<sup>b</sup> Department of Physics, Yeshiva University, New York, NY 10016, USA

\*Corresponding author: iew0@lehigh.edu

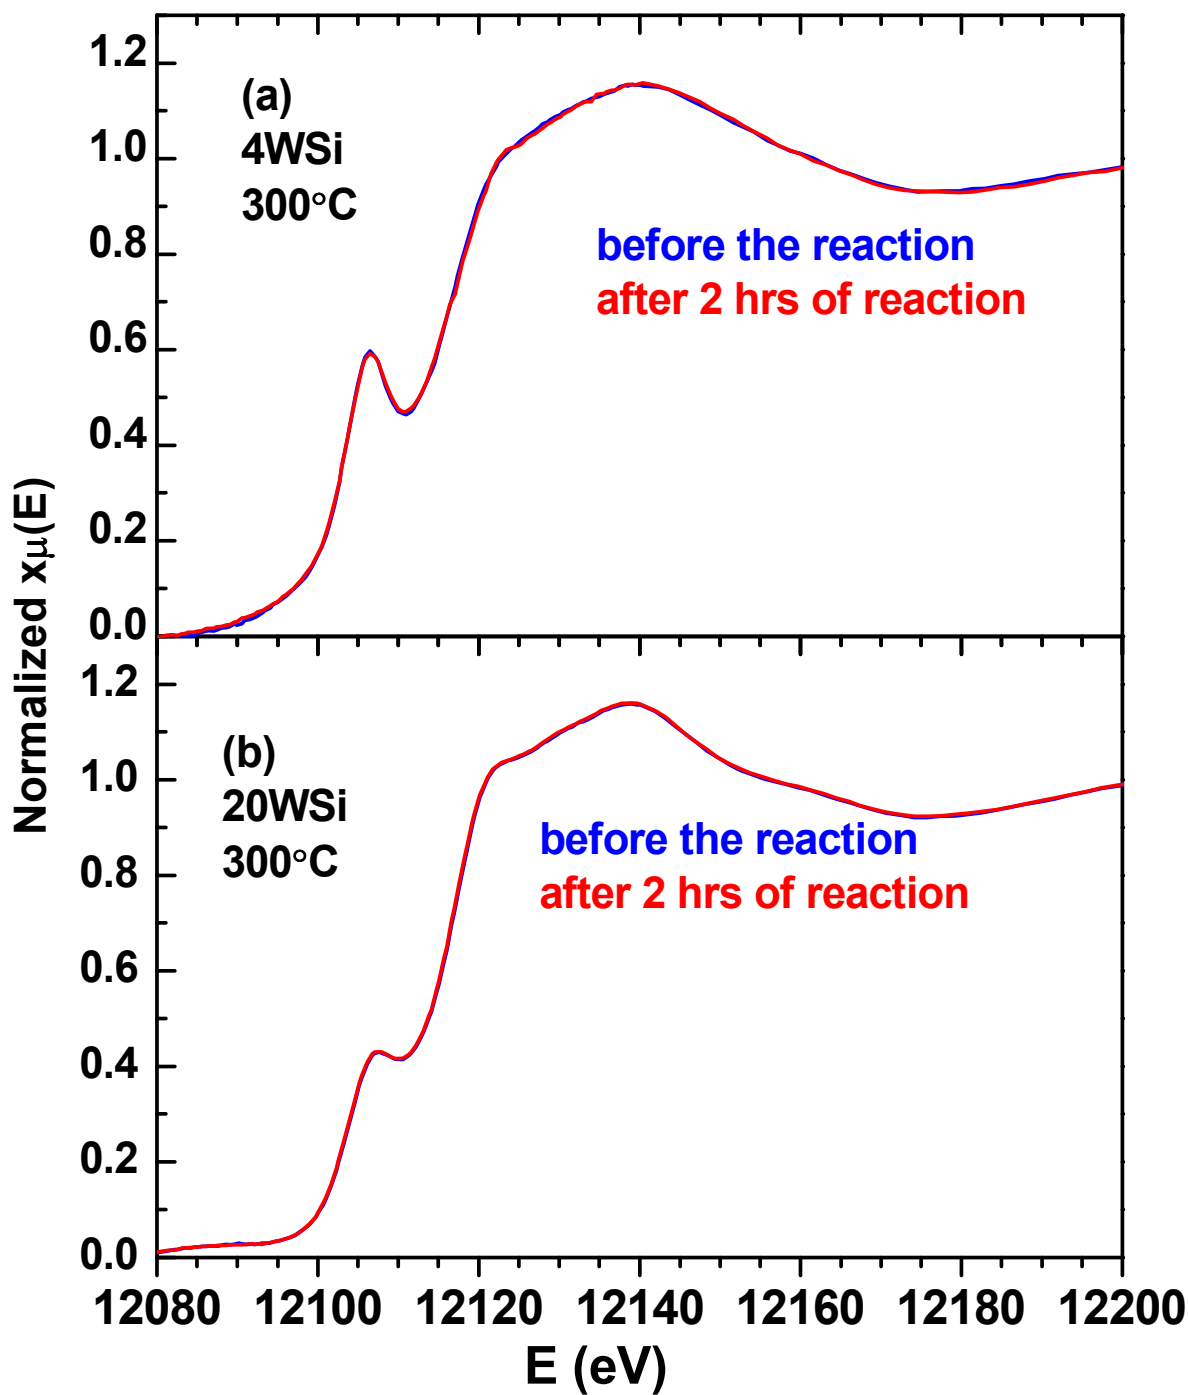

**Figure S1.** *In situ* W L<sub>1</sub>-edge XANES spectra of the (a) 4% and (b) 20% supported WO<sub>x</sub>/SiO<sub>2</sub> catalysts before and during reaction at 300°C.

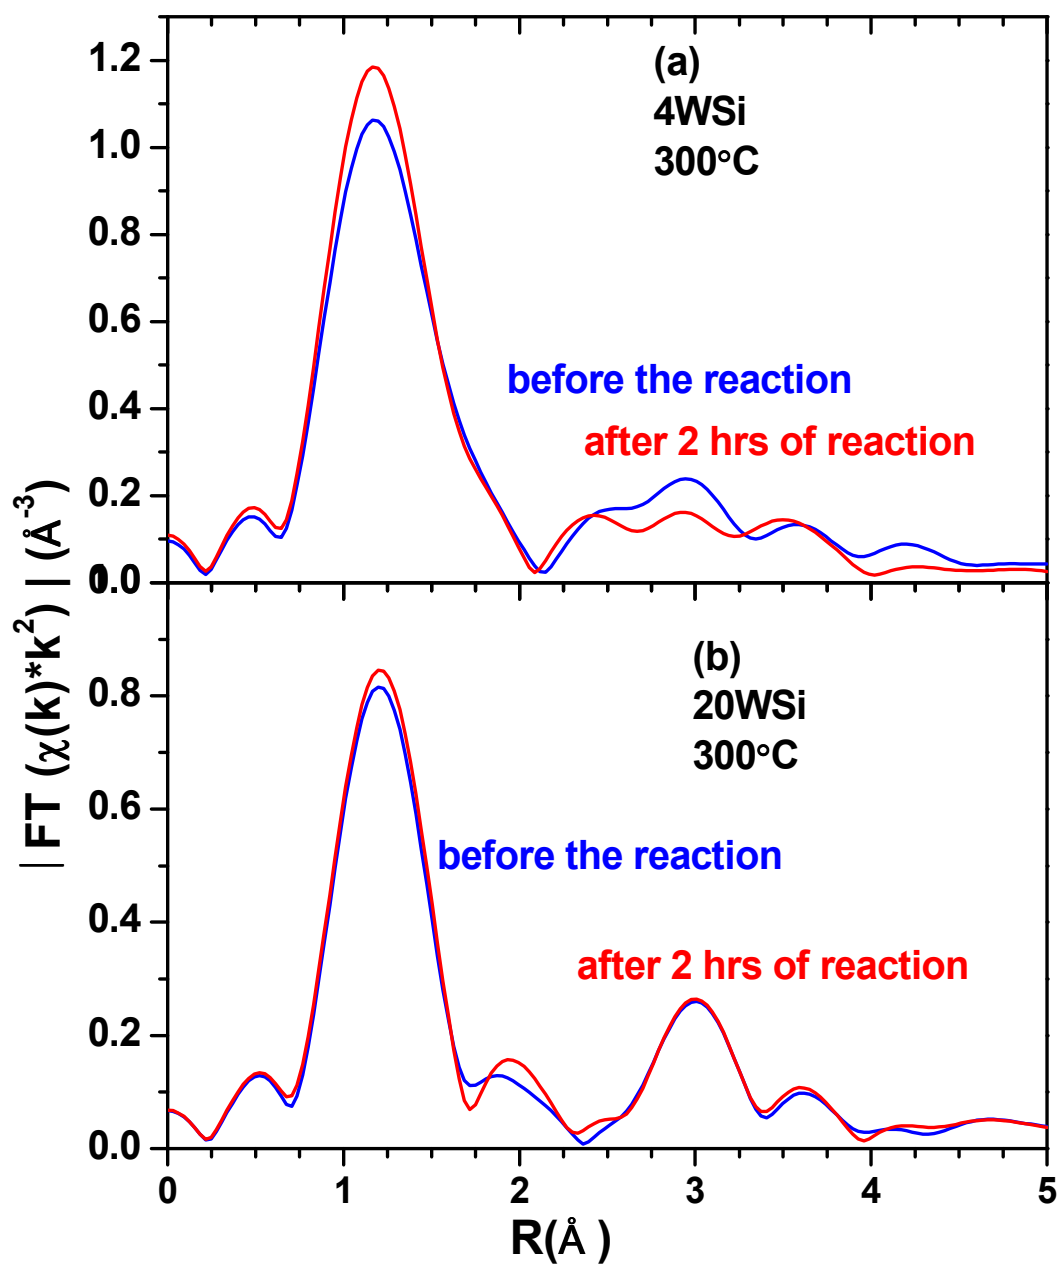

**Figure S2.** Magnitudes of Fourier-transformed  $k^2$ -weighted *in situ* W  $L_1$ -edge EXAFS spectra in non-phase-corrected  $R$  space for the (a) 4% and (b) 20% catalysts before (blue) and during reaction (red) at 300°C.

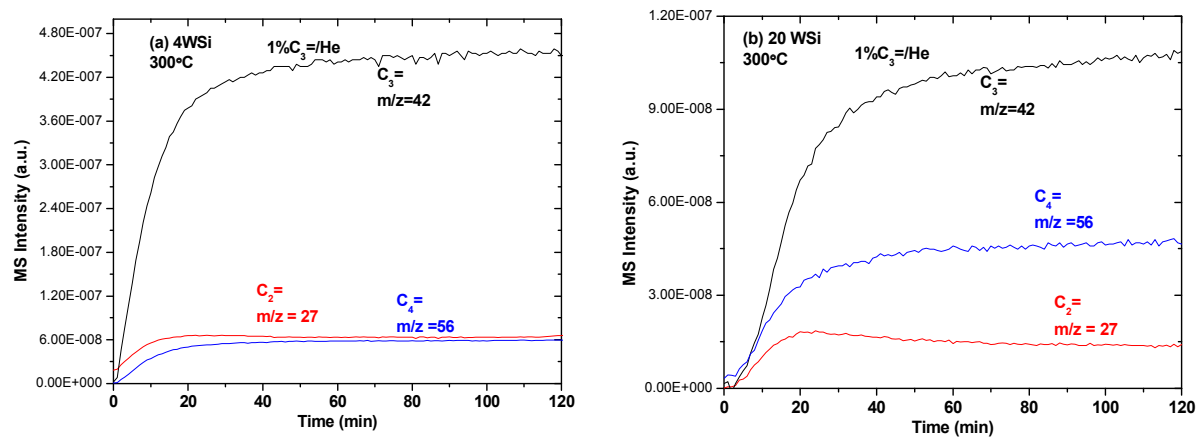

**Figure S3.** *Operando* MS spectra for the (a) 4% and (b) 20% catalyst which were simultaneously collected along with XANES/EXAFS measurements.

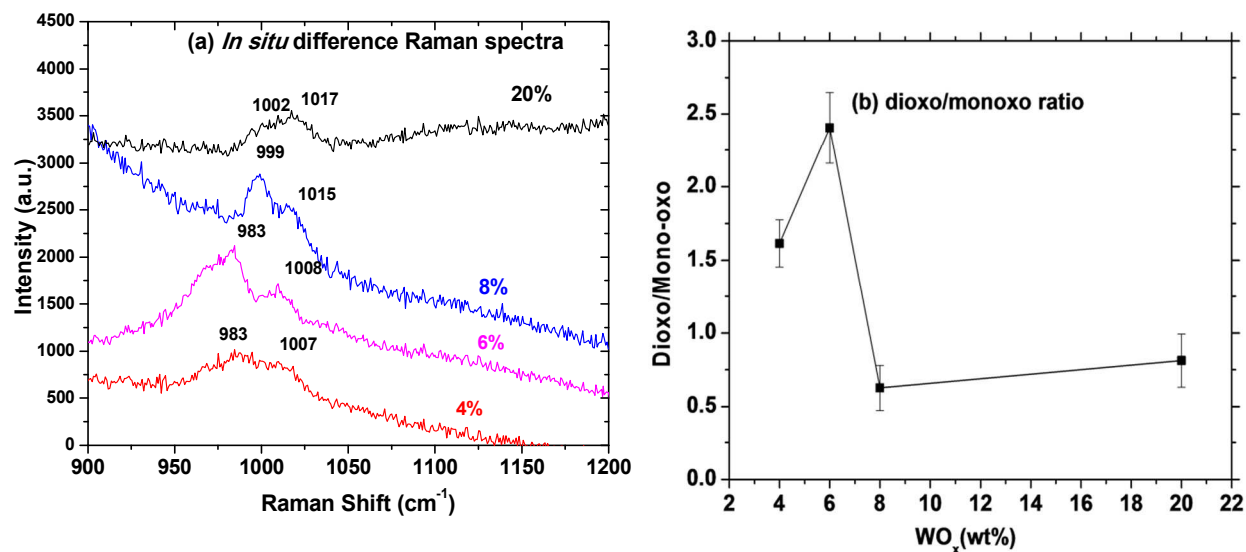

**Figure S4.** (a) *In situ* difference Raman spectra (442 nm) of the supported  $\text{WO}_x/\text{SiO}_2$  catalysts under dehydrated conditions (flowing  $\text{O}_2/\text{Ar}$  at  $300^\circ\text{C}$ ). The  $\text{SiO}_2$  spectrum was subtracted from all of the spectra. (b) The ratio of dioxo/mono-oxo obtained from integration of their respective raw Raman bands.

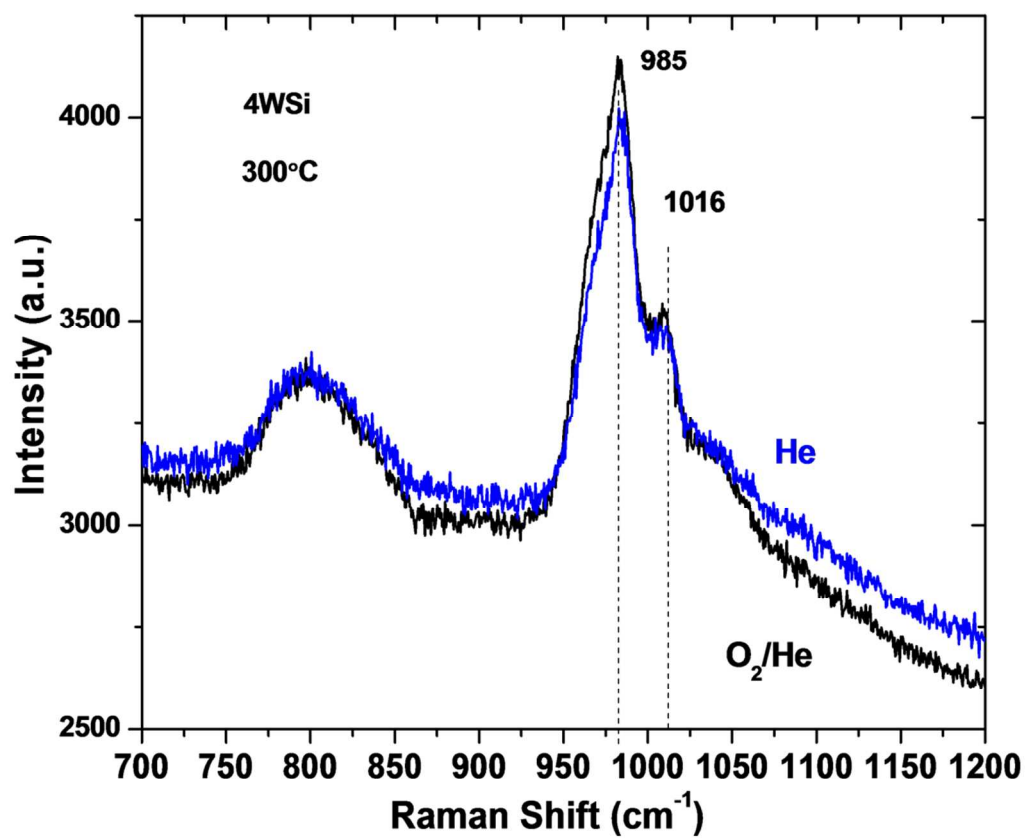

**Figure S5.** *In situ* Raman spectra of supported 4%WO<sub>x</sub>/SiO<sub>2</sub> catalyst at 300°C in flowing O<sub>2</sub>/He (30 minutes) or He (30 minutes).

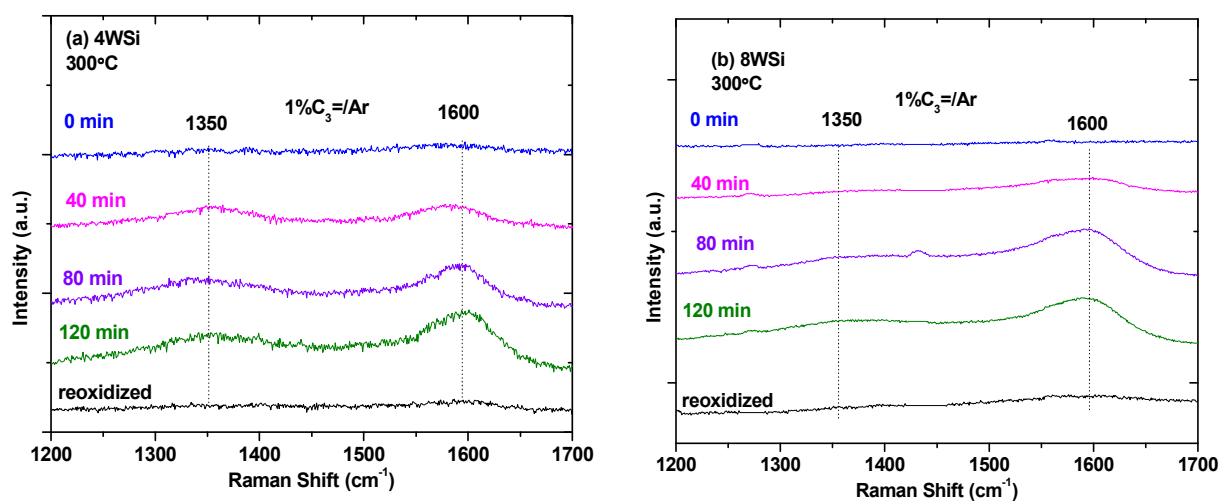

**Figure S6.** *Operando* Raman spectra for the (a) 4% and (b) 8% catalysts in the 1200-1700  $\text{cm}^{-1}$  range showing formation of some coke on the catalysts.

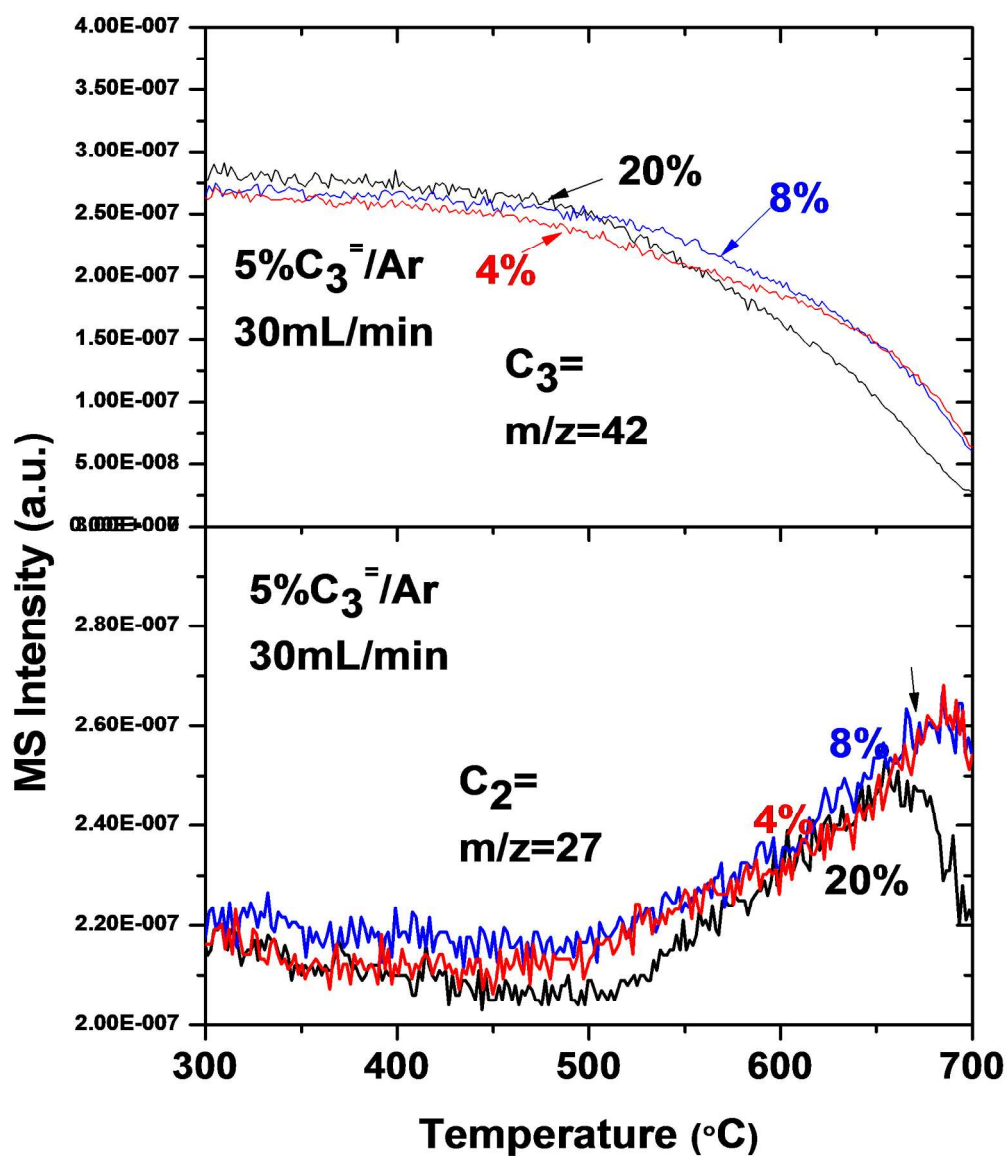

**Figure S7.** The  $C_3=$  and  $C_2=$  profiles during  $C_3=/Ar$ -TPSR as a function of  $WO_x$  loadings (correspond to Figures 9 and 10 in the main text).



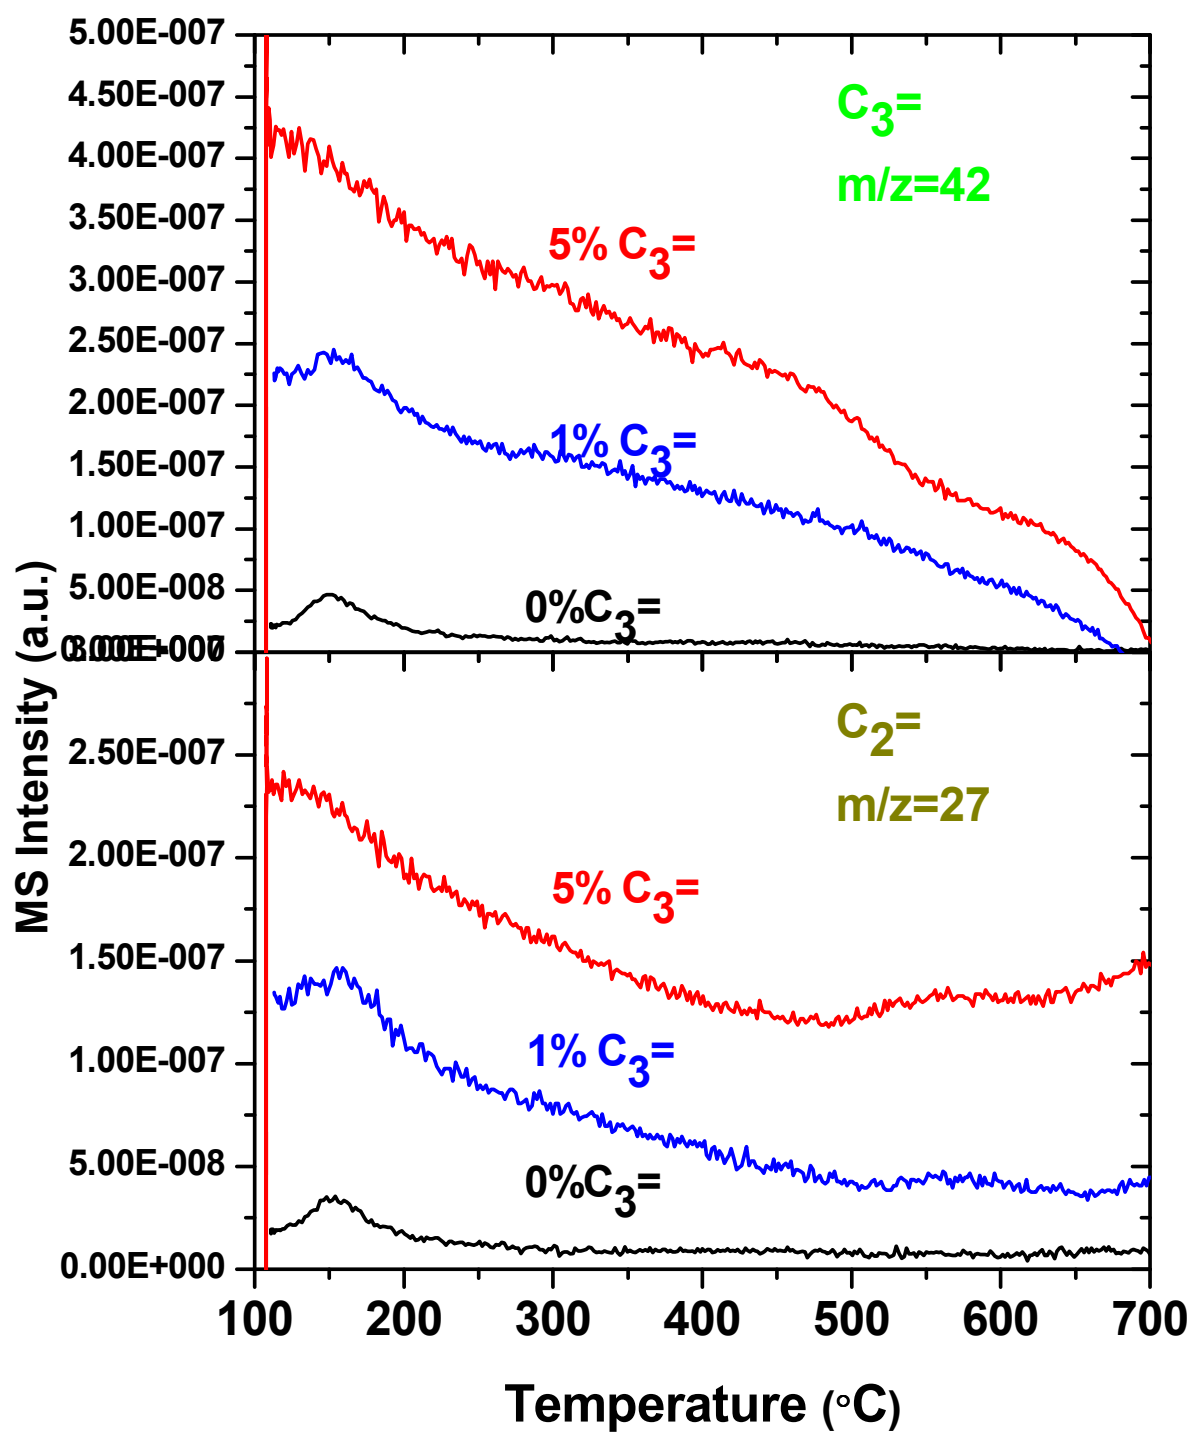

**Figure S8.** C<sub>3</sub>= and C<sub>2</sub>= profiles in flowing 0-5% C<sub>3</sub>= after 500°C C<sub>3</sub>= treatment and 100°C C<sub>3</sub>= adsorption
